# Supplementary material for: Graphite-based solid lubricant for high-temperature lubrication
Source: Springer Nature journal article supplement (doi:10.1007/s40544-020-0456-2), 2020-11-25
Supplement: 40544_2020_456_MOESM1_ESM.pdf [file 40544_2020_456_MOESM1_ESM.pdf]

## Electronic Supplementary Material

# Graphite-based solid lubricant for high-temperature lubrication

Wenjuan HUAI, Chenhui ZHANG\*, Shizhu WEN

State Key Laboratory of Tribology, Tsinghua University, Beijing 100084, China

Supporting information to <https://doi.org/10.1007/s40544-020-0456-2>

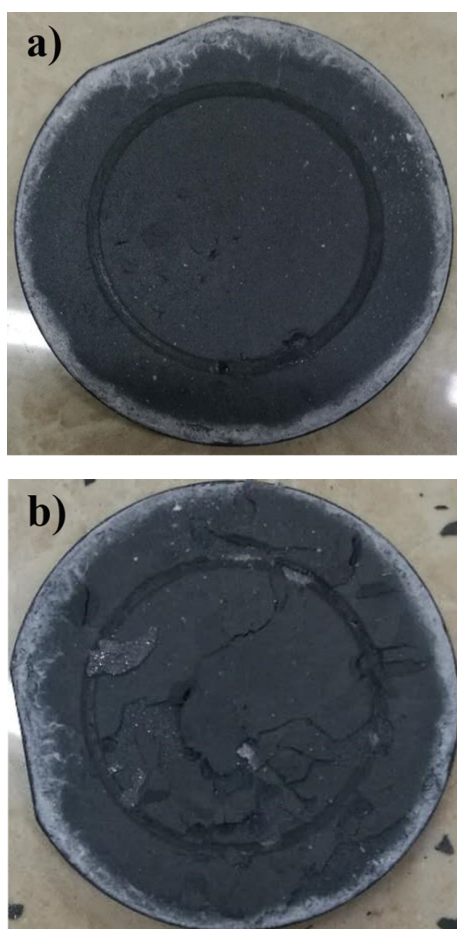

**Fig. S1** Images of solid lubricating coating cooling to (a)  $\sim 200$  °C and (b) room temperature after the friction test at 900 °C under the air atmosphere.

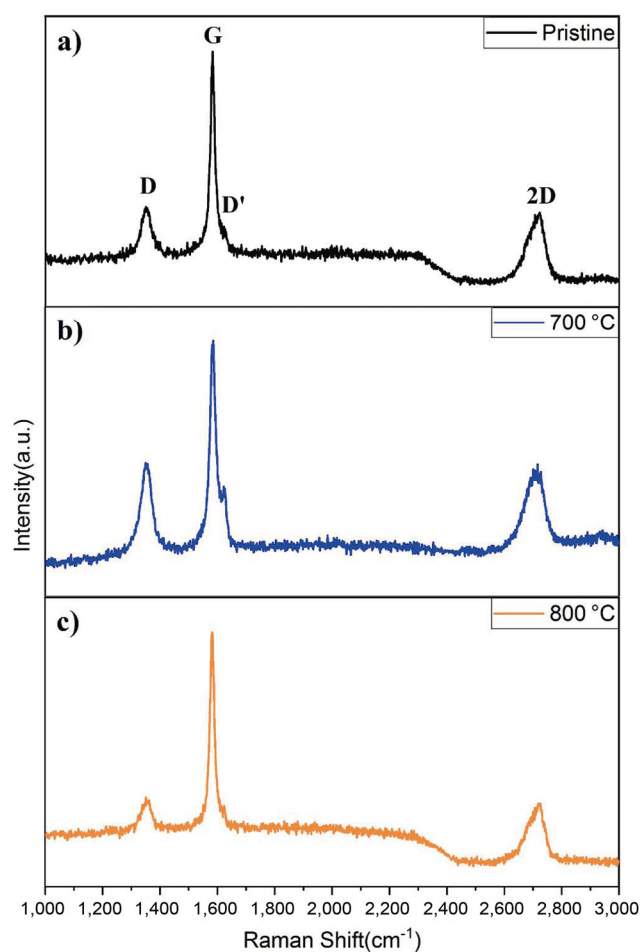

**Fig. S2** Micro-Raman spectra of (a) the pristine coating and the wear track of the coating after the friction test at (b) 700 °C and (c) 800 °C.

\* Corresponding author: Chenhui ZHANG, E-mail: [chzhang@tsinghua.edu.cn](mailto:chzhang@tsinghua.edu.cn)

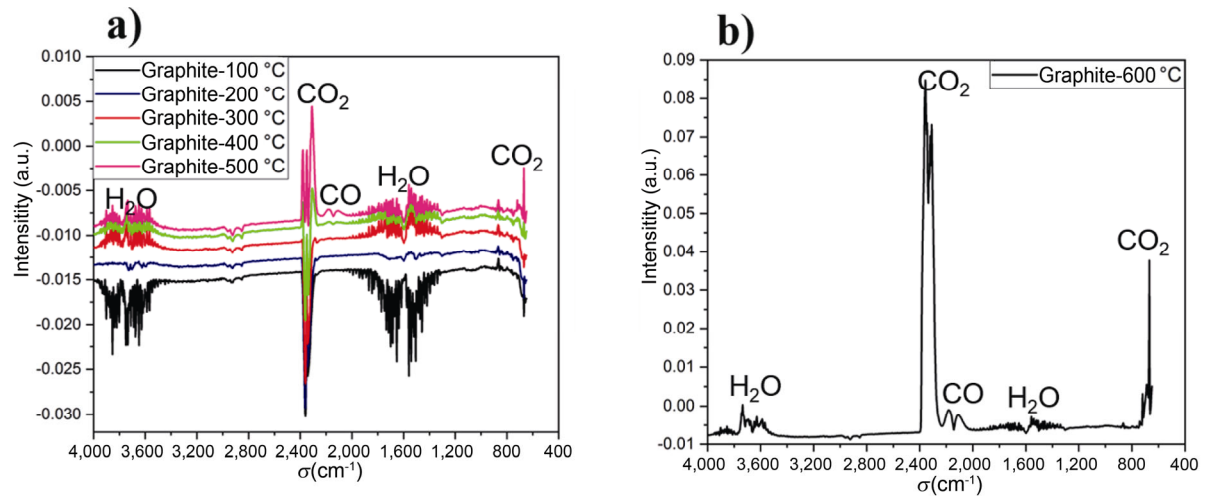

**Fig. S3** FTIR spectra, collected *in situ*, of the evolved gases from the pristine graphite (a) within the temperature range of 100–500 °C and (b) at 600 °C. The 600 °C FTIR spectrum was separated for clarity.

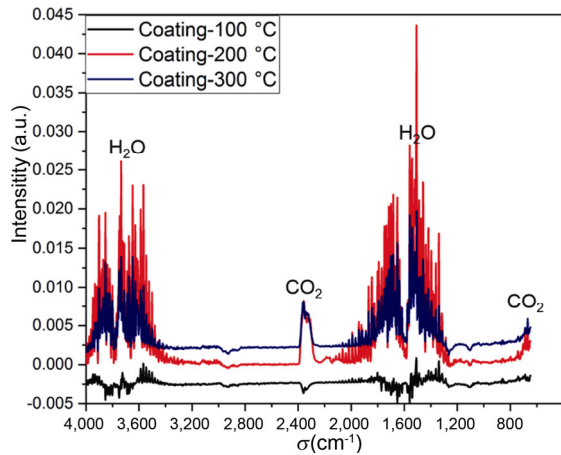

**Fig. S4** FTIR spectra, collected *in situ*, of the as-prepared coating in the temperature range of 100–300 °C.

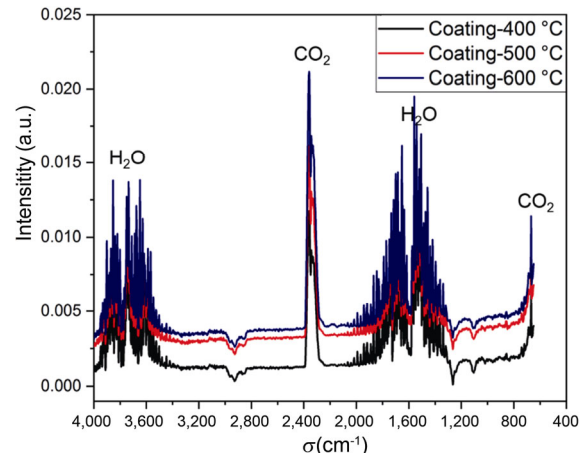

**Fig. S5** FTIR spectra, collected *in situ*, of as-prepared coating in the temperature range of 400–600 °C.

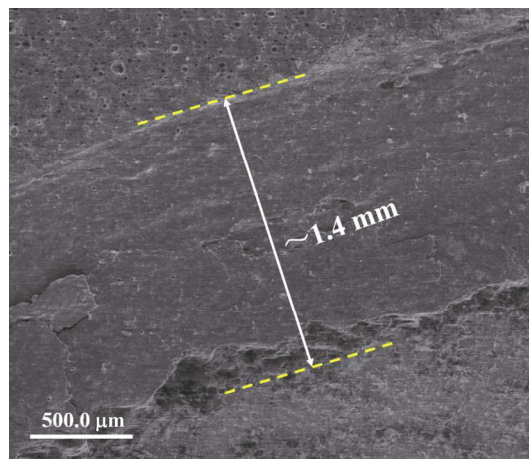

**Fig. S6** SEM image of the wear track after the friction test. The wear track was relatively wide with both complete and partial coating.

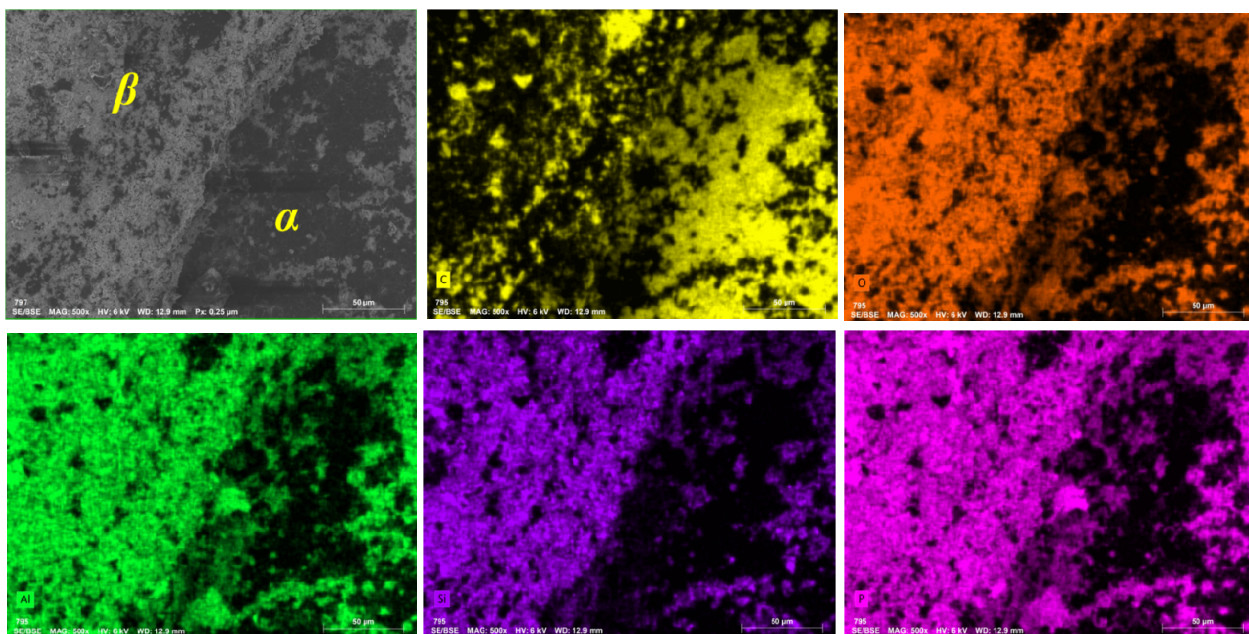

**Fig. S7** EDS mapping showing the surface elemental distribution of  $\alpha$  and  $\beta$  zones in the lubricating coating after the friction test at 700 °C.

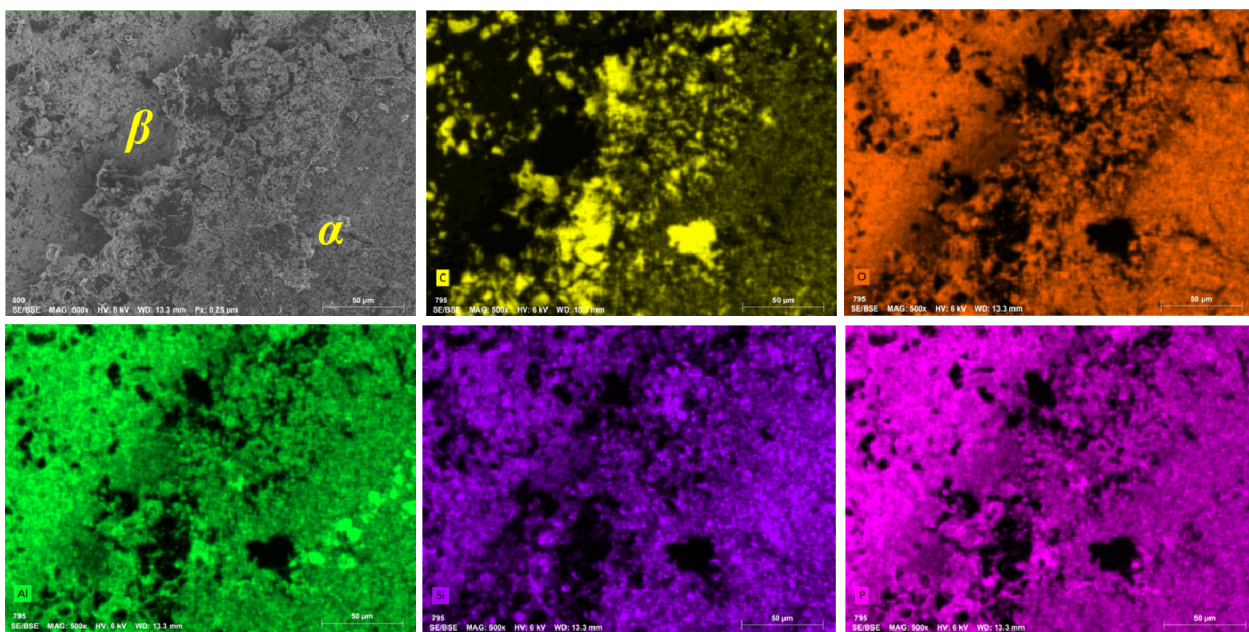

**Fig. S8** EDS mapping showing the surface elemental distribution of  $\alpha$  and  $\beta$  zones in the lubricating coating after the friction test at 800 °C.
